# Supplementary material
Source: HighWire-hosted journal article supplement (https://www.rcpjournals.org/highwire/filestream/12490/field_highwire_adjunct_files/1/Dasgupta_supplementary_material_S2.pdf)

## Clinical Management Pathway for Multidisciplinary Specialties

Clinical Suspicion of Metastases of Undefined Primary Origin (MUO)

History – Comprehensive

Clinical Examination - Thorough including Breast (females), Testes (males), Lymph Nodes (cervical/SCF/axillary/inguinal), Skin and Thyroid. Include Rectal, Pelvic and ENT examination, if appropriate.

Blood tests- FBC, U/E, LFT, Bone Profile, Clotting Profile.

Imaging – CT CAP

Tumour Markers (as appropriate):

CEA and CA19-9

AFP and hCG- Midline Mass/Nodes and or Retroperitoneal Nodes

AFP- if Clinical/Radiological Suspicion of Hepatocellular CA (HCC)

PSA (in men) and CA125 (in women)

Myeloma screen

Please ensure Patient and Family/Next of Kin Awareness of AOS/MUO Referral.

Proceed with Pathway only if Patient Fit for Active Treatment and/or Investigations Likely to Change Outcome.

Consider Early Referral to Specialist Palliative Team.

Histopathology- Biopsy from Accessible Site,  
**if appropriate** (morphology and IHC).

Refer to AOS and or to Site-Specific MDM for Further Management (9.00 am – 5.00 pm; Mon-Fri).

Seek early advice from local AOS and/or MUO/CUP team at any point in pathway if needed

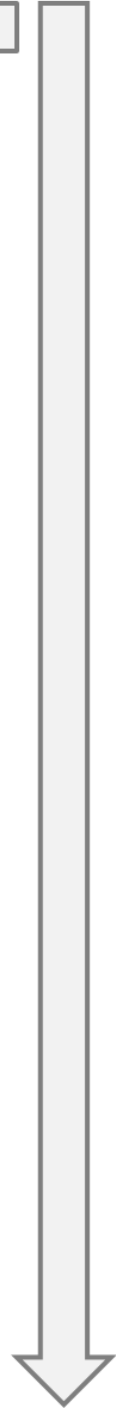

Supplement: Dasgupta_supplementary_material_S2.pdf [file Dasgupta_supplementary_material_S2.pdf]
